# Supplementary material
Source: PubMed Central journal article supplement (PMC5489735)

Bochaton et al. Human impacts reduce morphological diversity in an insular species of lizard.  
*Proc. B.*

Supplementary material 2: Map of the Lesser Antilles with all modern *Anolis* species (in italic) included in our study next to their bank of origin. The isobath line (-100m) is indicated around each bank and show the morphology of the area during Pleistocene. A detailed view of Marie-Galant Island also shows the location of the three investigated fossil deposits containing *Anolis ferreus* remains.

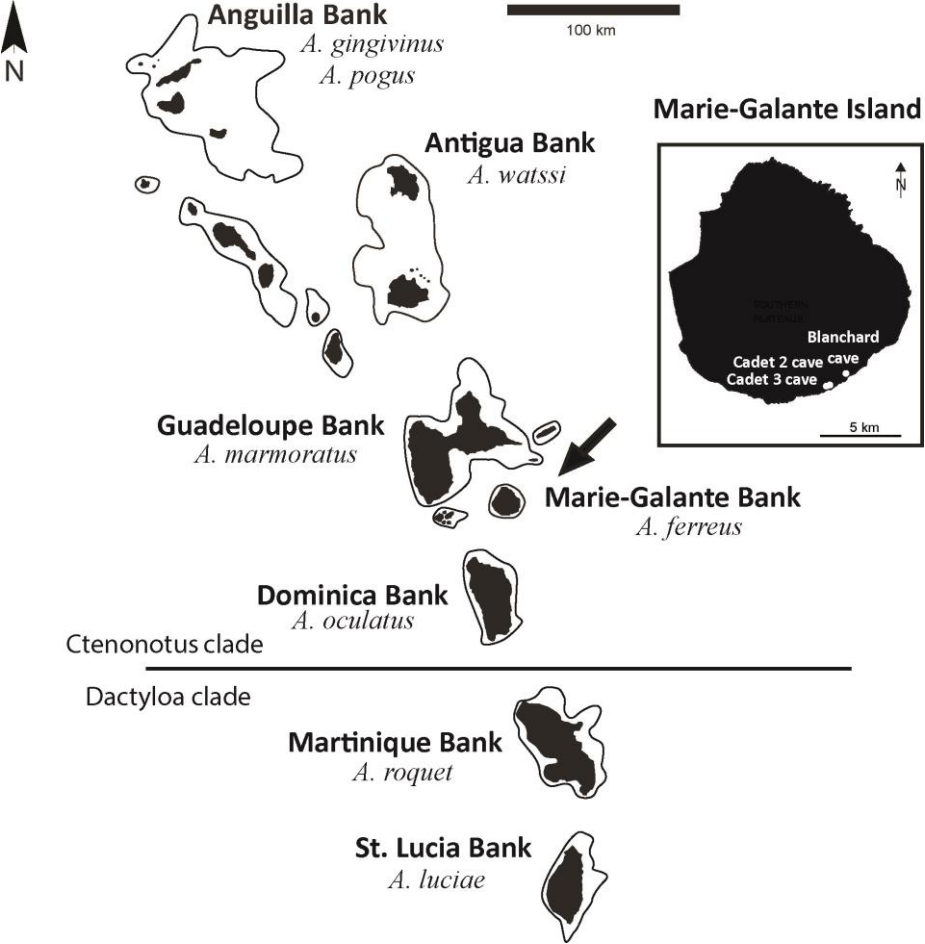

Supplement: rspb20170921supp2.pdf [file rspb20170921supp2.pdf]
