# Supplementary material
Source: PubMed Central journal article supplement (PMC5489735)
Supplement: rspb20170921supp3.pdf [file rspb20170921supp3.pdf]

Supplementary material 3: List of the fossil dentaries included in geometric morphometrics analyses

| <b>N°</b> | <b>Site</b> | <b>Context</b> | <b>Datation</b> |
|-----------|-------------|----------------|-----------------|
| 1         | Cadet 2     | US501          | Holocene        |
| 2         | Cadet 2     | US502          | Holocene        |
| 3         | Cadet 2     | US502          | Holocene        |
| 4         | Cadet 2     | US502          | Holocene        |
| 5         | Cadet 2     | US502          | Holocene        |
| 6         | Cadet 2     | US502          | Holocene        |
| 7         | Cadet 2     | U1-U4          | Holocene        |
| 8         | Cadet 2     | U4 Dec1        | Holocene        |
| 9         | Cadet 2     | U4 Dec1        | Holocene        |
| 10        | Cadet 2     | U4 Dec1        | Holocene        |
| 11        | Cadet 2     | U4 Dec1        | Holocene        |
| 12        | Cadet 2     | U4 Dec1        | Holocene        |
| 13        | Cadet 2     | U4 Dec2        | Holocene        |
| 14        | Cadet 2     | U4 Dec2        | Holocene        |
| 15        | Cadet 2     | U4 Dec2        | Holocene        |
| 16        | Cadet 2     | U4             | Holocene        |
| 17        | Cadet 2     | U5A-L1         | Pleistocene     |
| 18        | Cadet 2     | U5A-L2         | Pleistocene     |
| 19        | Cadet 2     | U5A-L4         | Pleistocene     |
| 20        | Cadet 2     | U5B            | Pleistocene     |
| 21        | Cadet 2     | U5C-L2         | Pleistocene     |
| 22        | Cadet 2     | e O22          | Pleistocene     |
| 23        | Cadet 2     | Layer 07.9     | Pleistocene     |
| 24        | Cadet 2     | Layer 07.9     | Pleistocene     |
| 25        | Cadet 2     | Layer 07.9     | Pleistocene     |
| 26        | Cadet 2     | Layer 07.9     | Pleistocene     |
| 27        | Cadet 2     | Layer 07.9     | Pleistocene     |
| 28        | Cadet 2     | Layer 07.9     | Pleistocene     |
| 29        | Cadet 2     | Layer 07.9     | Pleistocene     |
| 30        | Cadet 2     | Layer 07.9     | Pleistocene     |
| 31        | Cadet 2     | Layer 07.9     | Pleistocene     |
| 32        | Cadet 2     | Layer 07.9     | Pleistocene     |
| 33        | Cadet 2     | Layer 07.9     | Pleistocene     |
| 34        | Cadet 2     | Layer 07.9     | Pleistocene     |
| 35        | Cadet 2     | Layer 07.9     | Pleistocene     |
| 36        | Cadet 2     | Layer 07.9     | Pleistocene     |
| 37        | Cadet 2     | Layer 07.9     | Pleistocene     |
| 38        | Cadet 2     | Layer 07.9     | Pleistocene     |
| 39        | Cadet 2     | Layer 07.9     | Pleistocene     |
| 40        | Cadet 2     | U5a-O22        | Pleistocene     |
| 41        | Cadet 2     | U5a-O22        | Pleistocene     |
| 42        | Cadet 2     | U5a-O22        | Pleistocene     |

|    |         |         |             |
|----|---------|---------|-------------|
| 43 | Cadet 2 | U5a-022 | Pleistocene |
| 44 | Cadet 2 | U5a-022 | Pleistocene |
| 45 | Cadet 2 | U5a-021 | Pleistocene |
| 46 | Cadet 2 | U5a-021 | Pleistocene |
| 47 | Cadet 2 | U5a-021 | Pleistocene |
| 48 | Cadet 2 | U5b-022 | Pleistocene |
| 49 | Cadet 2 | U5b-022 | Pleistocene |
| 50 | Cadet 2 | U5b-022 | Pleistocene |
| 51 | Cadet 2 | U5b-022 | Pleistocene |
| 52 | Cadet 2 | U5b-022 | Pleistocene |
| 53 | Cadet 2 | U5b-021 | Pleistocene |
| 54 | Cadet 2 | U5b-021 | Pleistocene |
| 55 | Cadet 2 | U5b-021 | Pleistocene |
| 56 | Cadet 2 | U5b-021 | Pleistocene |
| 57 | Cadet 2 | U5b-021 | Pleistocene |
| 58 | Cadet 2 | U5b-021 | Pleistocene |
| 59 | Cadet 2 | U5b-021 | Pleistocene |
| 60 | Cadet 2 | U5c-021 | Pleistocene |
| 61 | Cadet 2 | U5c-021 | Pleistocene |
| 62 | Cadet 2 | U5c-021 | Pleistocene |
| 63 | Cadet 2 | U5c-021 | Pleistocene |
| 64 | Cadet 3 | E3-9    | Pleistocene |
| 65 | Cadet 3 | E3-9    | Pleistocene |
| 66 | Cadet 3 | E3-9    | Pleistocene |
| 67 | Cadet 3 | E3-9    | Pleistocene |
| 68 | Cadet 3 | E3-9    | Pleistocene |
| 69 | Cadet 3 | E3-9    | Pleistocene |
| 70 | Cadet 3 | E3-9    | Pleistocene |
| 71 | Cadet 3 | E3-9    | Pleistocene |
| 72 | Cadet 3 | E3-9    | Pleistocene |
| 73 | Cadet 3 | E3-9    | Pleistocene |
| 74 | Cadet 3 | E3-9    | Pleistocene |
| 75 | Cadet 3 | E3-9    | Pleistocene |
| 76 | Cadet 3 | E3-9    | Pleistocene |
| 77 | Cadet 3 | E3-9    | Pleistocene |
| 78 | Cadet 3 | E3-9    | Pleistocene |
| 79 | Cadet 3 | E3-9    | Pleistocene |
| 80 | Cadet 3 | E3-9    | Pleistocene |
| 81 | Cadet 3 | E3-9    | Pleistocene |
| 82 | Cadet 3 | E3-9    | Pleistocene |
| 83 | Cadet 3 | E3-9    | Pleistocene |
| 84 | Cadet 3 | E3-9    | Pleistocene |
| 85 | Cadet 3 | E3-9    | Pleistocene |
| 86 | Cadet 3 | E3-9    | Pleistocene |
| 87 | Cadet 3 | E3-9    | Pleistocene |
| 88 | Cadet 3 | E3-9    | Pleistocene |

|     |           |                |             |
|-----|-----------|----------------|-------------|
| 89  | Cadet 3   | E3-9           | Pleistocene |
| 90  | Cadet 3   | E3-9           | Pleistocene |
| 91  | Cadet 3   | E3-9           | Pleistocene |
| 92  | Cadet 3   | E3-9           | Pleistocene |
| 93  | Cadet 3   | E3-9           | Pleistocene |
| 94  | Cadet 3   | E3-9           | Pleistocene |
| 95  | Cadet 3   | E3-9           | Pleistocene |
| 96  | Cadet 3   | E3-9           | Pleistocene |
| 97  | Cadet 3   | E3-9           | Pleistocene |
| 98  | Cadet 3   | E3-9           | Pleistocene |
| 99  | Cadet 3   | E3-9           | Pleistocene |
| 100 | Cadet 3   | E3-8           | Pleistocene |
| 101 | Cadet 3   | E3-8           | Pleistocene |
| 102 | Cadet 3   | E3-8           | Pleistocene |
| 103 | Cadet 3   | E3-8           | Pleistocene |
| 104 | Cadet 3   | E3-8           | Pleistocene |
| 105 | Cadet 3   | E3-8           | Pleistocene |
| 106 | Cadet 3   | E3-8           | Pleistocene |
| 107 | Cadet 3   | E4-7           | Holocene    |
| 108 | Cadet 3   | E4-7           | Holocene    |
| 109 | Cadet 3   | E4-7           | Holocene    |
| 110 | Cadet 3   | E4-7           | Holocene    |
| 111 | Cadet 3   | E4-7           | Holocene    |
| 112 | Cadet 3   | E4-7b          | Holocene    |
| 113 | Cadet 3   | E4-7b          | Holocene    |
| 114 | Cadet 3   | E4-7b          | Holocene    |
| 115 | Cadet 3   | E3-7           | Holocene    |
| 116 | Cadet 3   | E3-7           | Holocene    |
| 117 | Cadet 3   | E3-7           | Holocene    |
| 118 | Cadet 3   | E3-6           | Holocene    |
| 119 | Cadet 3   | E4-6           | Holocene    |
| 120 | Cadet 3   | E4-7 sup.      | Holocene    |
| 121 | Blanchard | S1 dec 24 c6   | Pleistocene |
| 122 | Blanchard | I30 dec 14 c5  | Pleistocene |
| 123 | Blanchard | I33a dec30 c5  | Pleistocene |
| 124 | Blanchard | I33a dec30 c5  | Pleistocene |
| 125 | Blanchard | I33a dec30 c5  | Pleistocene |
| 126 | Blanchard | I33a dec30 c5  | Pleistocene |
| 127 | Blanchard | I30 dec8 c2    | Pleistocene |
| 128 | Blanchard | H31-L dec35 cA | Pleistocene |
| 129 | Blanchard | I32-D dec22 c5 | Pleistocene |
| 130 | Blanchard | H33-B dec25 c5 | Pleistocene |
| 131 | Blanchard | I33-A dec29 c5 | Pleistocene |
| 132 | Blanchard | I33-A dec29 c5 | Pleistocene |
| 133 | Blanchard | I32-L dec23 c5 | Pleistocene |
| 134 | Blanchard | I32-L dec23 c5 | Pleistocene |

Bochaton et al. Human impacts reduce morphological diversity in an insular species of lizard.  
*Proc. B.*

|     |           |                |             |
|-----|-----------|----------------|-------------|
| 135 | Blanchard | I32-L dec23 c5 | Pleistocene |
| 136 | Blanchard | H33-B dec24 c5 | Pleistocene |
| 137 | Blanchard | I33-D dec29 c5 | Pleistocene |
